# Hierarchical machine learning predicts geographical origin of *Salmonella* within four minutes of sequencing

Sion C. Bayliss<sup>1\*</sup>, Rebecca K. Locke<sup>2,3</sup>, Claire Jenkins<sup>4</sup>, Marie Anne Chattaway<sup>4</sup>, Timothy J. Dallman<sup>5</sup> and Lauren A. Cowley<sup>2</sup>

<sup>1</sup>Bristol Veterinary School, University of Bristol, Langford, Bristol, BS40 5DU, UK, [s.bayliss@bristol.ac.uk](mailto:s.bayliss@bristol.ac.uk)

<sup>2</sup>Milner Centre for Evolution, Life Sciences Department, University of Bath, BA2 7AY, UK

<sup>3</sup>Genomic Laboratory Hub (GLH), Addenbrooke's Hospital, Cambridge University Hospitals NHS Foundation Trust, CB2 0QQ, UK

<sup>4</sup>Gastrointestinal Reference Services, UK Health Security Agency, Colindale, NW9 5EQ, UK

<sup>5</sup>Institute for Risk Assessment Sciences (IRAS), Utrecht University, 3508 TD Utrecht, Netherlands

\*Corresponding Author

## **Abstract**

*Salmonella enterica* serovar Enteritidis is one of the most frequent causes of Salmonellosis globally and is commonly transmitted from animals to humans by the consumption of contaminated foodstuffs. Herein, we detail the development and application of a hierarchical machine learning model to rapidly identify and trace the geographical source of *S. Enteritidis* infections from whole genome sequencing data. 2,313 *S. Enteritidis* genomes collected by the UKHSA between 2014-2019 were used to train a 'local classifier per node' hierarchical classifier to attribute isolates to 4 continents, 11 sub-regions and 38 countries (53 classes). Highest classification accuracy was achieved at the continental level followed by the sub-regional and country levels (macro F1: 0.954, 0.718, 0.661 respectively). A number of countries commonly visited by UK travellers were predicted with high accuracy (hF1: >0.9). Longitudinal analysis and validation with publicly accessible international samples indicated that predictions were robust to prospective external datasets. The hierarchical machine learning framework provides granular geographical source prediction directly from sequencing reads in <4 minutes per sample, facilitating rapid outbreak resolution and real-time genomic epidemiology.

**Keywords:** genomics, machine learning, epidemiology, public health, gastroenteritis

## 30 **Introduction**

31 Diarrhoeal disease is the most common illnesses caused by contaminated food, with 550 million  
32 people falling ill each year, including 220 million children under the age of 5 years (WHO 2022).  
33 High disease-burden foodborne pathogens represent a major public health concern,  
34 necessitating real-time epidemiological monitoring and follow-up. Outbreak investigations are  
35 often confounded by the complexity of the international food-trade networks which distributes  
36 zoonotic food-borne pathogens across the globe (Gould et al. 2017). Understanding the  
37 contributing factors, whether they be environmental, geographical or zoonotic is critical for  
38 designing public health intervention strategies to combat and prevent food-borne pathogen  
39 outbreaks (Pires et al. 2009).

40 In many developed nations, *Salmonella enterica* serovar Enteritidis is the most common cause  
41 of diarrhoeal disease (UKHSA 2021) and represents a significant economic and healthcare  
42 burden (Daniel et al. 2020). In the UK, nationwide vaccination and monitoring programmes have  
43 been responsible for a precipitous drop in detectable *Salmonella* from local animal products and  
44 a concurrent drop in human infection rates (Surveillance, Zoonoses, Epidemiology and Risk  
45 Food and Farming Group 2007; Tam et al. 2012). However, recent studies have identified  
46 imported foodstuffs (McLauchlin et al. 2019; Somorin, Odeyemi, and Ateba 2021) and foreign  
47 travel (PHE 2017) as more pertinent *Salmonella* infection risks.

48 Whole genome sequencing (WGS) has become a powerful tool for untangling complex  
49 networks of pathogen dissemination by providing high-resolution sub-typing for transmission  
50 tracing as well as detailed information on antimicrobial and virulence status (Allard et al. 2018).  
51 Since 2014, the UK Health Security Agency (UKHSA) has routinely applied WGS to all clinically  
52 identified cases of *Salmonella* in the UK alongside collecting detailed metadata, such as patient  
53 recent foreign travel (Ashton et al. 2016). This programme has been instrumental in identifying  
54 various international outbreaks, such as the largest known salmonellosis outbreak in Europe  
55 where, between 2015 and 2018 *S. Enteritidis*-contaminated eggs resulted in 1,209 reported  
56 cases across 16 countries (Dallman et al. 2016; Pijnacker et al. 2019). This approach to  
57 inferring geographical source from pathogen genomes has historically required phylogenetic  
58 population structure analysis which requires significant bioinformatic skills, is computationally  
59 expensive and scales poorly with the increasingly vast collections of bacterial genomes  
60 available for analysis (Cowley et al. 2016, Dallman et al. 2016). Furthermore, due to the  
61 resources involved, this type of investigation is often only undertaken in exceptional cases  
62 representing a threat to public health.

63 In order to promote rapid outbreak responses, novel methods are required to translate the  
64 increasing volumes of pathogen genomes generated by surveillance programmes into  
65 immediate and actionable information for epidemiologists. *S. Enteritidis* represents a desirable  
66 initial target for such tools due to its large public health burden. WGS provides high-resolution  
67 information about pathogen strain relatedness and, by association, contains contextualised  
68 information on geographical or host origin. In the case of *S. Enteritidis*, which has a population  
69 structure observably stratified by geographical source (Li et al. 2021, Feasey et al. 2016), there  
70 is potential for genomics to provide key information for successful epidemiological follow-up,  
71 namely the likely country of origin of an infectious strain, and an opportunity to rapidly enact  
72 intervention strategies. Herein we present the first implementation of a hierarchical machine  
73 learning (hML) classifier for geographical source attribution of *S. Enteritidis* genomes. We  
74 applied this model to the UKHSA's large and uniquely detailed genomic database of clinical *S.*  
75 *Enteritidis* isolates collected between January 2014-April 2019. Using these data, we have  
76 generated a fully automated analysis pipeline with which to monitor imported cases of *S.*  
77 *Enteritidis*. The hML model was structured to provide a granular and multi-level prediction of the  
78 geographical origin of an *S. Enteritidis* genome and can do so in under 4 minutes directly from  
79 raw sequencing reads.

80 **Results**

81

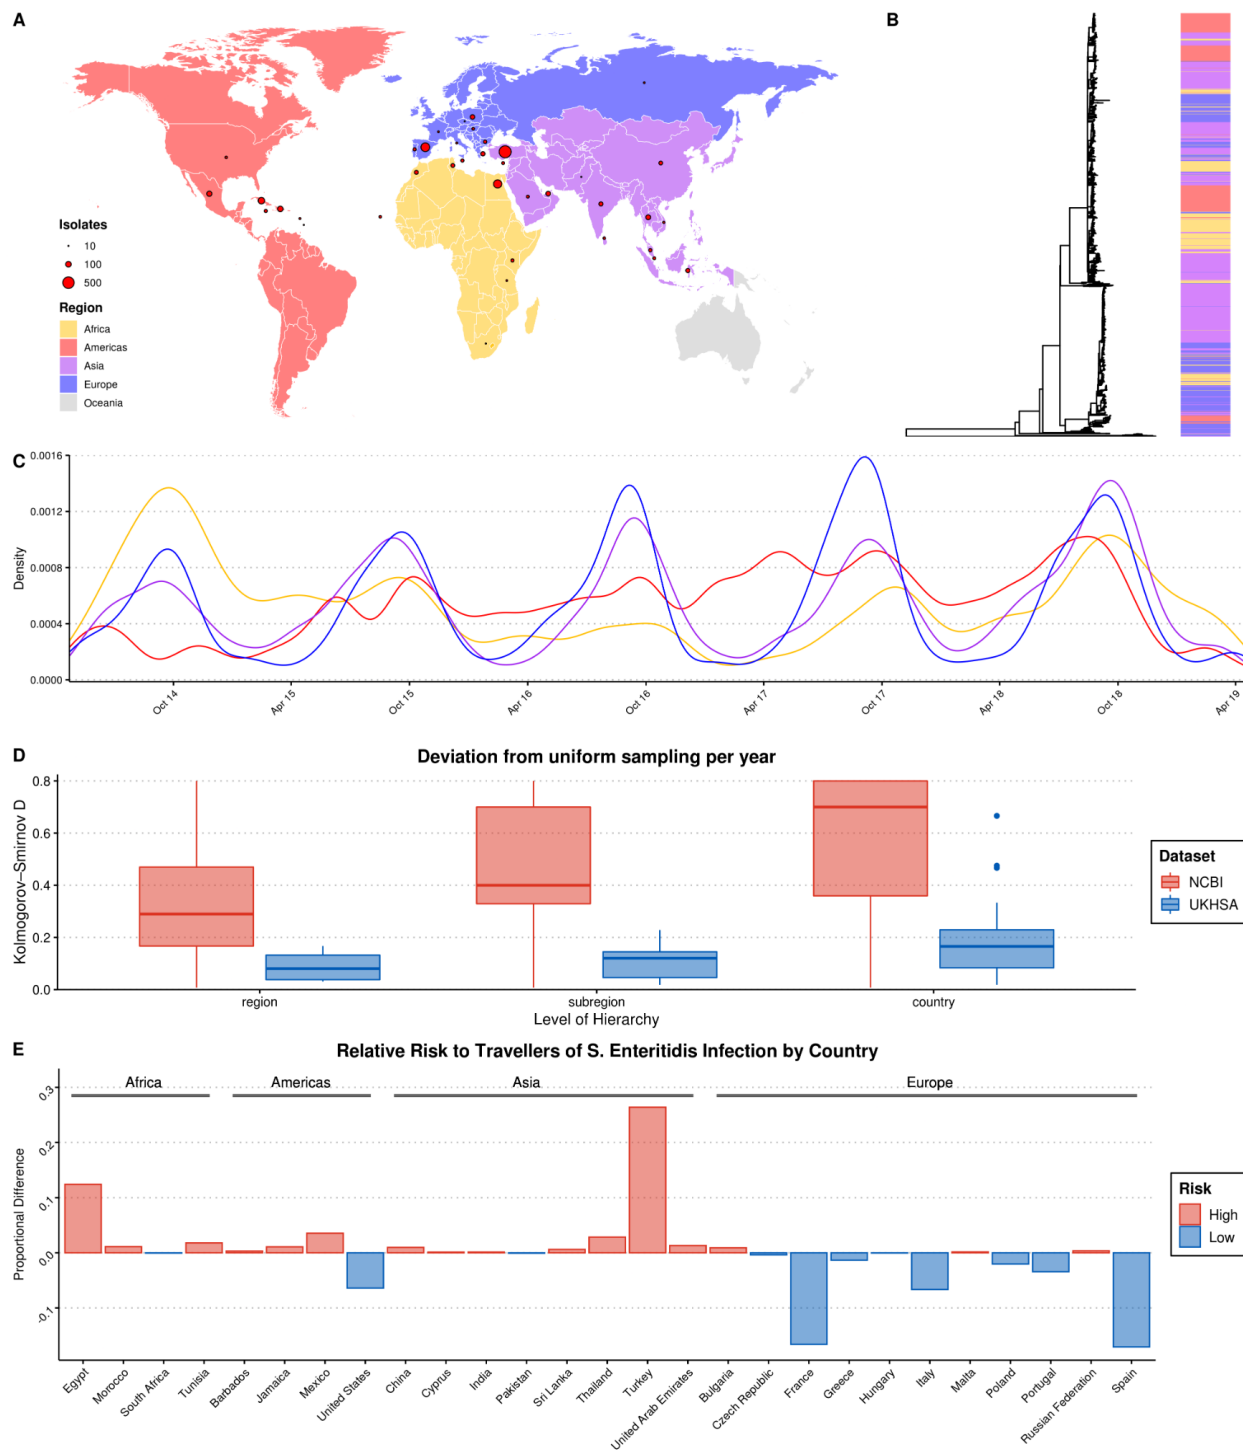

82

83 **Figure 1. Summary of *S. Enteritidis* isolates collected by the UKHSA from UK clinical**  
 84 **patients who recently reported foreign travel between 2014-2019. A) Geographical**  
 85 **distribution of 2313 *S. Enteritidis* isolates by reported foreign travel. Variably sized points**

86 represent the number of samples per country. The map is coloured by region (Africa: yellow,  
87 Americas: red, Asia: purple, Europe: blue). **B)** Maximum likelihood phylogenetic tree of 2313 *S.*  
88 Enteritidis isolates with bar coloured by region of origin. **C)** Kernel density plot indicating  
89 sampling density per region through time. **D)** Comparison of the consistency of sampling effort  
90 of the UKHSA to all publicly available *S. Enteritidis* isolates on NCBI for the same period.  
91 Isolates were resampled to control for variable sample number per year and compared to a  
92 uniform distribution using the Kolmogorov-Smirnov D statistic (NCBI = red, UKHSA = blue).  
93 Higher values indicate greater deviation from a uniform distribution. **E)** Relative risk per country  
94 of acquiring *S. Enteritidis* infection when travelling. A risk score was generated by dividing the  
95 proportion of UKHSA clinical isolates per country by the proportion of all UK travellers travelling  
96 to that country as recorded by the Office of National Statistics (ONS). Only countries present in  
97 both datasets were used to calculate proportions.

98

## 99 **The UKHSA genomic surveillance programme consistently samples *S. Enteritidis*** 100 **associated with international travel through time**

101 Broad and unbiased surveillance by the UKHSA of all clinically reported *S. Enteritidis* cases in  
102 the UK coupled with returning traveller data has provided a large genomic dataset  
103 representative of *S. Enteritidis* infections in the UK between 2014-2019 (**Figure 1**). This  
104 consisted of 10,223 isolates, of which 3,434 had matched recent reported travel data collected  
105 as a part of the UKHSA's 'enhanced surveillance' programme.

106 Recent travel was reported from 122 countries across 5 continents. A source of potential bias,  
107 common to bacterial genomics analysis, is the over-representation of clonally related isolates  
108 due to their increased prevalence during outbreaks ([Feil and Spratt 2001](#); [Ebel et al. 2016](#)). A  
109 single, random representative isolate per country was selected for each clone, defined as a 5-  
110 SNP cluster by SNP Address, in order to reduce the influence of highly related clonal outbreaks  
111 on the resulting ML model ([Dallman et al. 2018](#)). The 5-SNP cutoff is routinely used as the  
112 definition of an outbreak by the UKHSA for genomic disease surveillance ([Chattaway et al.](#)  
113 [2019](#)). After quality-filtering, downsampling and removal of low incidence countries (<10  
114 isolates), 2,313 genomes from 38 countries from 4 continents were included in the final dataset  
115 for ML (**Figure 1A**).

116 Grouping these countries by geographic region and subregion using the UN M49 Standard for  
117 Regional Codes provided a framework for a granular geographical analysis and an established  
118 hierarchy comprised of countries/subregions/regions ([Statistics Division of the United Nations](#)  
119 [Secretariat 2020](#)). Phylogenetic analysis indicated that the dataset displayed a strong  
120 phylogeographical signal, with large clusters of isolates from geographically related countries  
121 clustering together (**Figure 1B**). An interactive maximum likelihood phylogenetic tree is available

122 in Microreact at <https://microreact.org/project/kQEhcTy4ohcqN9bjcPUWLw-ukhsasenteritidishml>  
123 ([Argimón et al. 2016](#)). *S. Enteritidis* infection rates in Europe and Asia were highly seasonal,  
124 with significantly increased infection during the summer months (**Figure 1C**). This was less  
125 pronounced in travel to/from the Americas and Africa.

126 An analysis of the consistency of sampling effort over time identified that some notable  
127 countries in the dataset were comprised of samples collected predominantly during a single  
128 year, such as Sri Lanka, Tunisia and Dominica, and others were missing data from one or more  
129 years (**Figure S1**). However, a comparison of the UKHSA collection to a dataset of location/date  
130 matched genomes from the NCBI Pathogen Detection Database identified that the UKHSA  
131 dataset represented a significantly more consistent sampling effort which was less influenced by  
132 sporadic outbreaks (**Figure 1D**).

133 The countries with the highest number of travel associated *S. Enteritidis* cases were Turkey  
134 (804), Spain (357), Egypt (343), Cuba (190) and the Dominican Republic (117) (**Figure 1A**).  
135 Controlling for the volume of UK travellers as recorded by the Office of National Statistics over a  
136 matched time period allowed for the identification of countries with disproportionate low- or high-  
137 risk of *S. Enteritidis* infection after travelling (**Figure 1E**) ([Office of National Statistics 2020](#)).  
138 Travellers to Turkey and Egypt were at a disproportionately higher risk of *S. Enteritidis* infection  
139 during this period. Conversely, travellers to France and Spain, two of the more popular travel  
140 destinations for UK travellers, were very low-risk. This highlights that the dataset was a product  
141 of the volume of UK-travel combined with a variable risk of infection per country. Consequently,  
142 there was a large degree of class imbalance (i.e. different number of isolates per country) in the  
143 dataset used for ML, in addition to low/absent sampling coverage of some parts of the globe.  
144 However, when considering larger geographical groupings (i.e. subregion/region) these  
145 imbalances were less pronounced or absent.

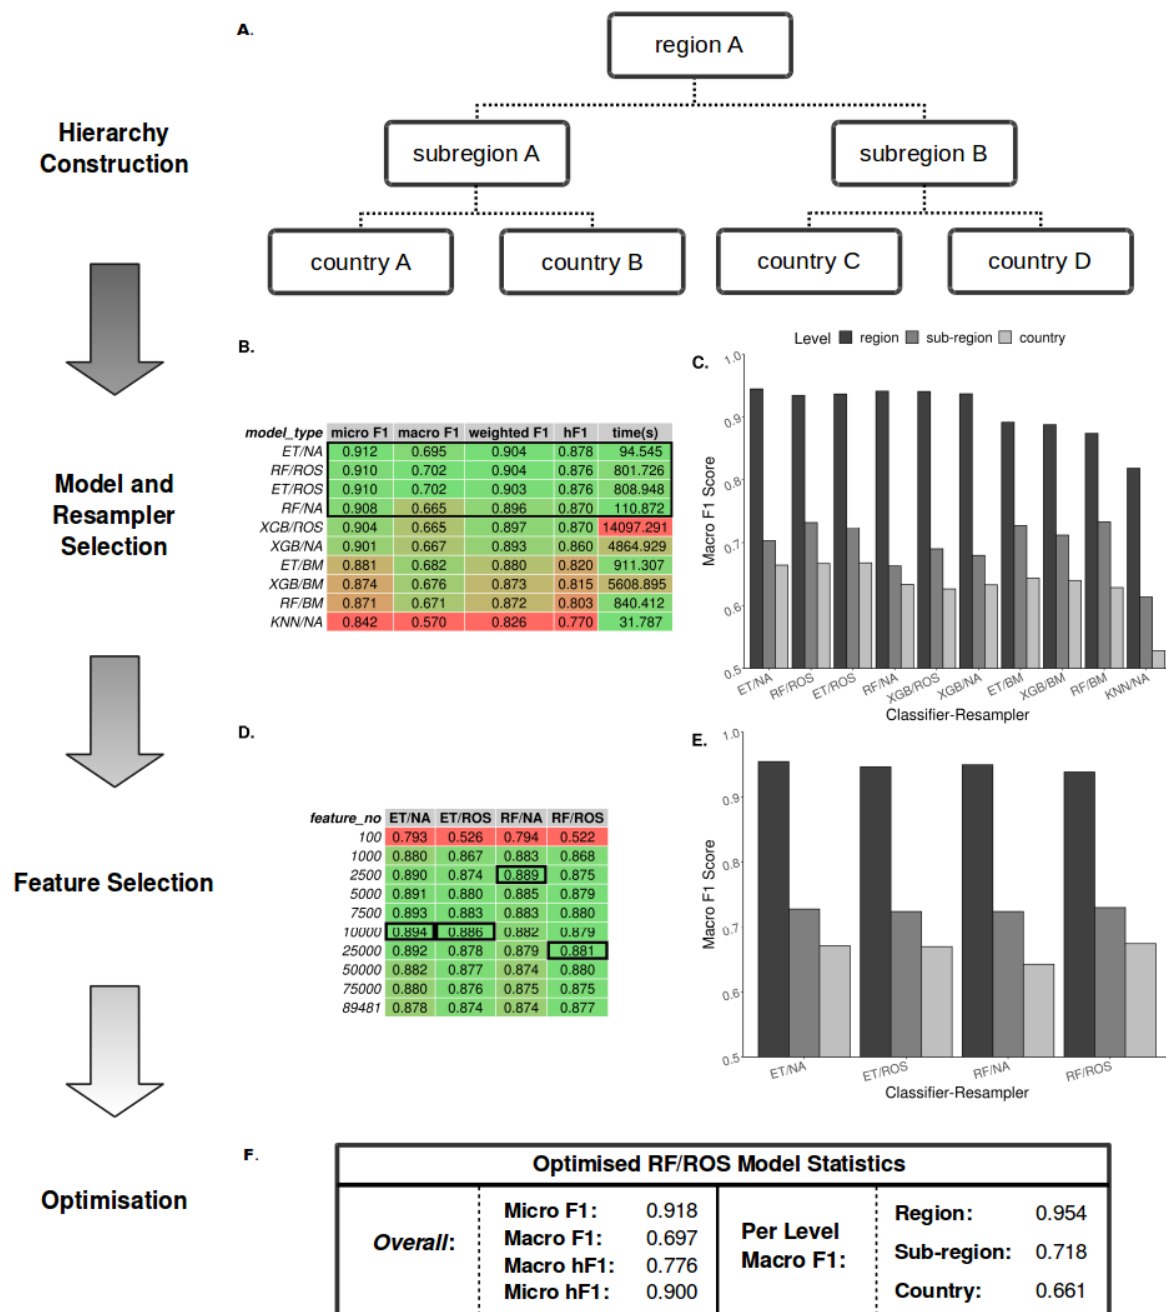

146

147 **Figure 2. Summary statistics showing model and resampling scheme selection, feature**  
 148 **selection and optimisation. A)** Example schematic of a geographical hierarchy based upon  
 149 the UN M49 Standard for regional codes. **B)** Table of summary statistics for the ten top-  
 150 performing co-optimised model and resampling methods from a cohort of 36 combinations,  
 151 sorted by hF1 (high-low). Training time reported in final column in seconds. A black box  
 152 indicates the top four models used for feature A **C)** Grouped bar chart comparing macro  
 153 F1 per hierarchical level for the ten top-performing model/resampled combinations. **D)** Table of  
 154 summary statistics for random forest feature selection applied to the four top-performing co-  
 155 optimised model and resampling methods. Black boxes indicate the optimal number of features

156 per combination. **E)** Grouped bar chart comparing macro F1 per hierarchical level for the four  
157 top-performing co-optimised model and resampling methods after feature selection optimisation.  
158 **F)** Summary statistics for the final optimised Random Forest - Random Oversampler model  
159 (25,000 features selected). ML Model abbreviations: Random Forest (RF), XGBoost (XGB),  
160 Extra Trees (ET), K-Nearest Neighbours (KNN). Resampler abbreviations: No Resampling (NA),  
161 Random Undersampler (RUS), Random Oversampler (ROS), Balancing Mean (BM),  
162 Hierarchical Mean (HM).

163

## 164 **A novel hierarchical model provides real-time geographical source attribution prediction** 165 **directly from sequencing reads in under four minutes**

166 Taking advantage of the hierarchical structure of geographical data, we designed a multi-level  
167 hML classifier following a “Local Classifier per Node” framework ([Silla and Freitas 2011](#)). This  
168 was made up of 15 individual multi-class classifiers, one per node (1 root, 4 regional, 11 sub-  
169 regional). In total, 53 individual classes (4 regions, 11 sub-regions and 38 countries) were  
170 predictable by the model. Sample classification was performed using a top-down approach,  
171 where samples are first classified at the root node into ‘regions’ (e.g. Africa) then, if the  
172 predicted probability is greater than a minimum threshold value (0.5), samples are passed to the  
173 appropriate regional node to be classified into a nested subset of ‘subregions’ (e.g. Northern  
174 Africa) and finally passed to a subregional node where they are classified into a nested subset  
175 of ‘countries’ (e.g. Egypt) (**Figure 2A**). Using this scheme no samples could be attributed to a  
176 class which was not a predicted class of a previous classifier (i.e. Africa → Southern  
177 Asia → France is not possible, but Africa → Northern Africa → Egypt is). Sample classification was  
178 exclusive, disallowing multiple classifications on the same hierarchical level for a single sample.

179 For rapid and minimal sample processing and to provide end-to-end sample classification  
180 directly from the sequencer, the model was trained on filtered unitig patterns (presence-  
181 absence) generated from quality controlled genomic short-read data files. Each local classifier  
182 per node was trained using only data pertinent to that node (e.g. a local subregion classifier was  
183 trained only on the data from its constituent countries). This end-to-end process, from FASTQ to  
184 sample prediction, is available on GitHub (<https://github.com/SionBayliss/HierarchicalML>).

185 Due to the imbalanced nature of the real-world surveillance dataset, it was necessary to test a  
186 range of classifier and resampler algorithms before selecting the top performing models (**Figure**  
187 **2B-C**). The top 4 models subsequently underwent feature selection (**Figure 2D-E**) followed by  
188 parameter optimisation using the TPOT genetic algorithm (**Figure 2F**). The optimised hML  
189 model produced a more accurate classification of the test dataset than a ‘flat’ classifier applied  
190 to a similarly pre-processed dataset (macro F1: 0.61) (**Table S1**). Based on these comparisons,  
191 the most desirable assessment metrics overall (i.e. high macro F1 at the country level, **Figure**  
192 **2E**) were from feature selection by a Random Forest (RF) classifier (25,000 unitig patterns)



193 before random oversampling to correct for class imbalance and final classification using an  
 194 optimised RF model. Assuming <100x read coverage, the entire pipeline takes ~3.5 min to  
 195 classify a novel samples using the pre-optimised model.

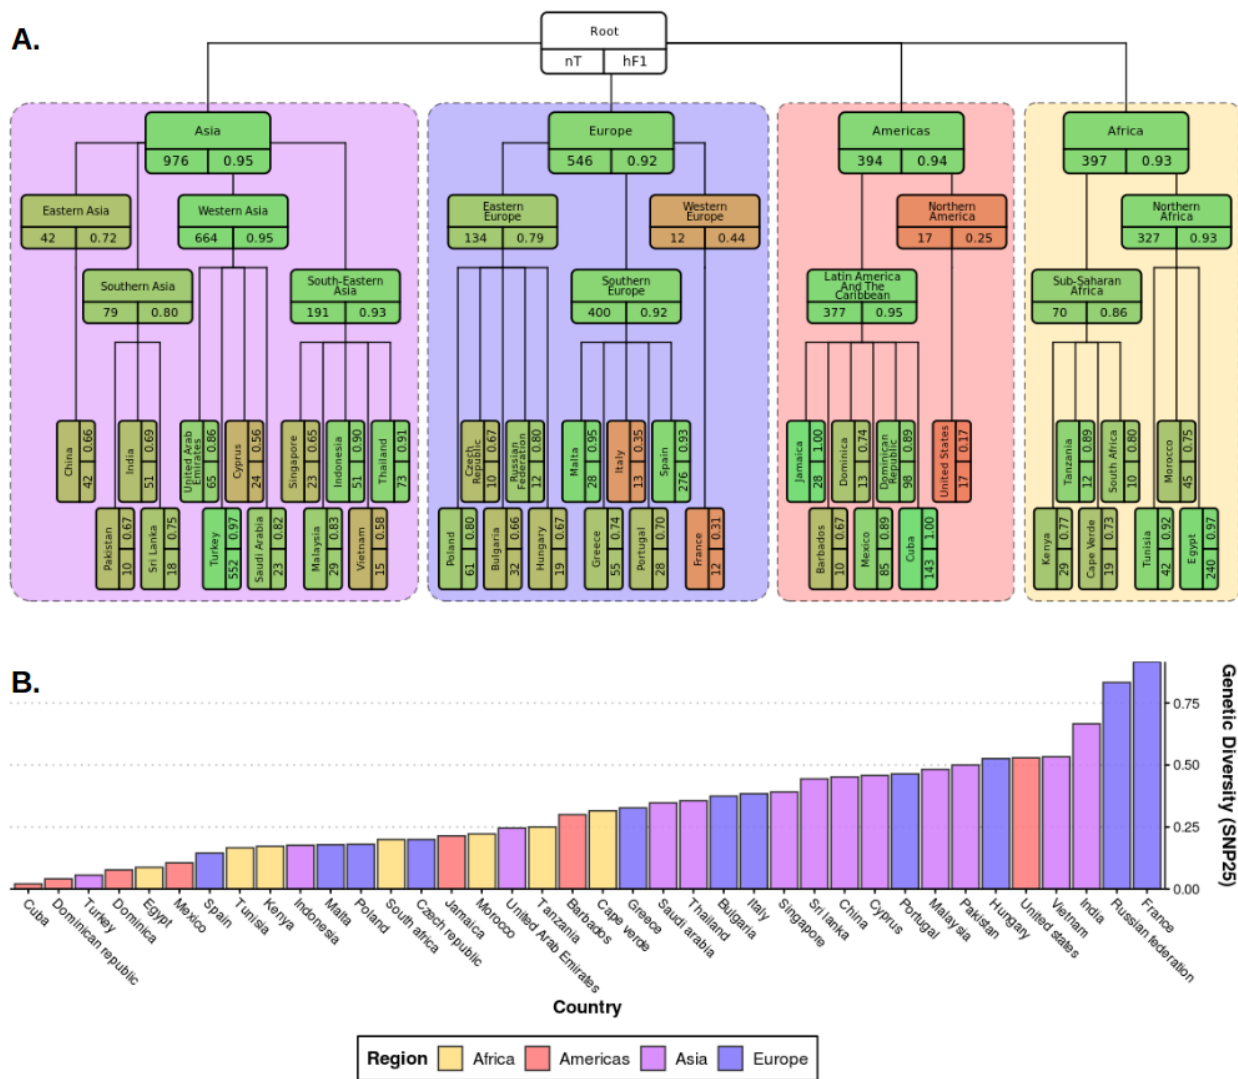

196  
 197 **Figure 3. Plots summarising test results from hML model and genetic diversity of**  
 198 **dataset. A)** Diagrammatic representation of classification metrics of the hML classifier applied to  
 199 the test dataset. Links between classes/nodes in the hierarchy are indicated by connecting  
 200 lines. Boxes represent individual classes in the ML model and are coloured by their hierarchical  
 201 F1 (hF1) scores. The top panel of each class box displays the class label, the bottom left panel  
 202 indicates the total number of samples for that class before the train/test split (75%/25%) and the  
 203 bottom right panel shows the class hF1 score calculated from the test dataset. Classes within  
 204 individual 'regions' (continents) were contained in a coloured background panel. **B)** Bar plot of  
 205 genomic diversity per country. Genomic diversity was estimated as the number of 25 SNP single  
 206 linkage clusters divided by the total numbers of samples per class. Panels (A) and bars (B) were  
 207 coloured according to region (Africa: yellow, Americas: red, Asia: purple, Europe: blue).  
 208

209 **Granular predictions are provided at a regional, subregional and individual country level**

210 Classification metrics were highest at the regional level (macro F1: 0.954), but less  
211 discriminatory at the sub-regional (macro F1: 0.718) and country levels (macro F1: 0.661)  
212 (**Figure 3A**). There was a moderate degree of variation in predictive accuracy between different  
213 geographical locations. Africa was the most consistent accurately classified region, with all  
214 country and subregional classes presenting a hF1 of >0.7. In The Americas, Latin American and  
215 Caribbean countries showed very high classification metrics (hF1: >0.8), whereas samples for  
216 the United States were consistently misclassified. All Asian classes were classified at moderate  
217 to high accuracy (hF1: 0.58-0.95). Europe was generally well classified (hF1: >0.66), but  
218 contained two classes, France and Italy, which were classified poorly (hF1: ~0.3). Further  
219 scrutiny of poorly performing classes showed a correlation between lack of training data and  
220 lower prediction accuracy (**Figure S2**). This did not fully explain the observed results as some  
221 countries with a similarly low number of samples to poorly predicted countries (e.g. Czech  
222 Republic, Pakistan) showed moderate classification accuracy. An analysis of genetic diversity  
223 within classes indicated that at least two of the most poorly classified countries, France and the  
224 United States, displayed both low numbers of samples and high genetic diversity (**Figure 3B**,  
225 **Figure S3**). Samples from recent travel to France were particularly diverse, arising from multiple  
226 highly diverse clades of *S. Enteritidis*. A range of countries which were commonly visited by UK  
227 travellers, such as Cuba, Egypt, Indonesia, Jamaica, Malta, Spain, Thailand, Tunisia and  
228 Turkey, were well predicted (hF1: >0.9).

229 In summary, these results suggest that the optimised model can attribute the geographical  
230 source of *S. Enteritidis* isolates with high confidence at a regional level whilst also providing  
231 more nuanced and granular predictions for a range of countries regularly visited by UK travellers  
232 with a very high degree of accuracy.

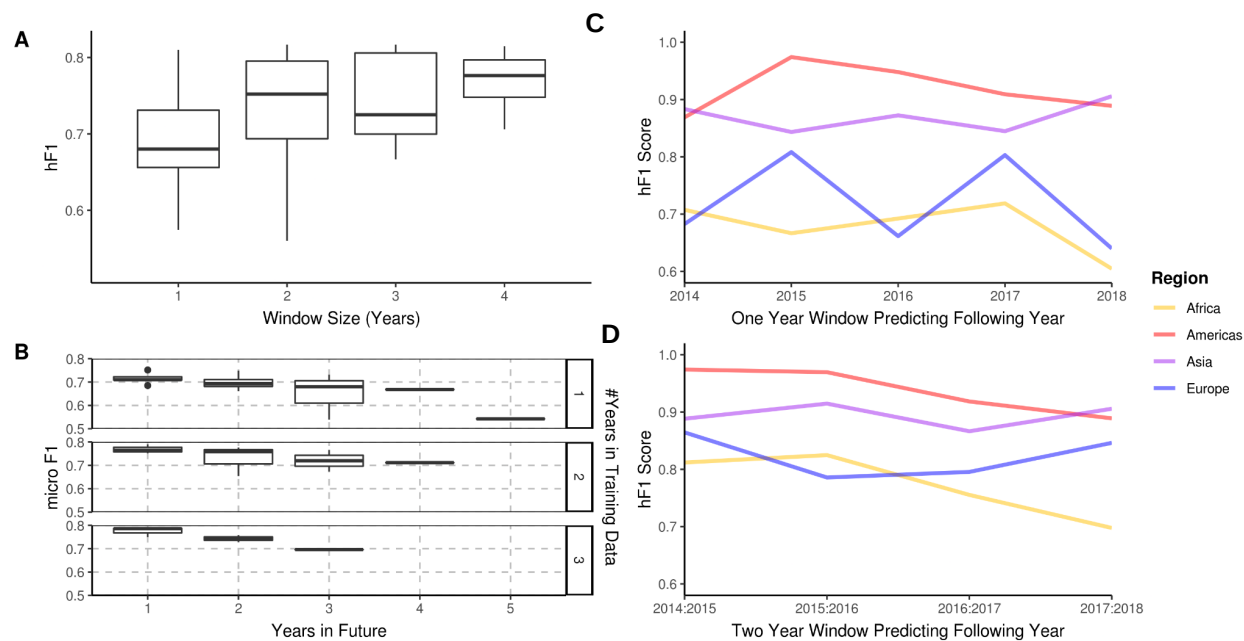

233

234 **Figure 4. A longitudinal analysis of the predictive performance of hML models on 2313 S.**  
 235 **enteritidis samples. A)** The hF1 scores of hML RF models trained on a subset of samples from  
 236 a 1-4 year moving window predicting the following year. **B)** The micro F1 scores of hML RF  
 237 models trained on a subset of samples from a 1-3 year moving window predicting 1-5 years into  
 238 the future. **C)** Regional hF1 scores of hML RF models trained on one-year sampling windows  
 239 predicting the following year. **D)** Regional hF1 scores of hierarchical models trained on two-year  
 240 sample windows predicting the following year.

241

242 **Models demonstrate durability to future predictions with two years previous training data**  
 243 **proving sufficient signal for accurate subsequent year predictions**

244 Bacterial population lineage composition is not expected to remain static through time, therefore  
 245 predictive models based on genomic data require periodic retraining. To understand the amount  
 246 of data required for accurate prospective prediction, we compared the outcomes of four yearly  
 247 window sizes (1, 2, 3 and 4 years) for the prediction of subsequent years (**Figure 4A**).  
 248 Predictive accuracy and consistency of prediction of the subsequent year improved on  
 249 increasing window size, with hF1 beginning to asymptote after two years. The largest  
 250 improvement was observed between 1-2 years' worth of data. A minor decrease in predictive  
 251 accuracy (micro F1: ~0.05 per year) was observed for each additional year into the future  
 252 (**Figure 4B**). A regional breakdown of the hF1 score indicated that a one-year window varied in  
 253 predictive accuracy per region per year (**Figure 4C**), but that a two-year window provided more  
 254 consistent and accurate predictions (**Figure 4D**). These results indicate that, should this model  
 255 be instituted for ML-enhanced genomic surveillance, it would require retraining on the two

256 previous years samples each year to provide an optimal trade-off between predictive accuracy  
 257 and training time.

258

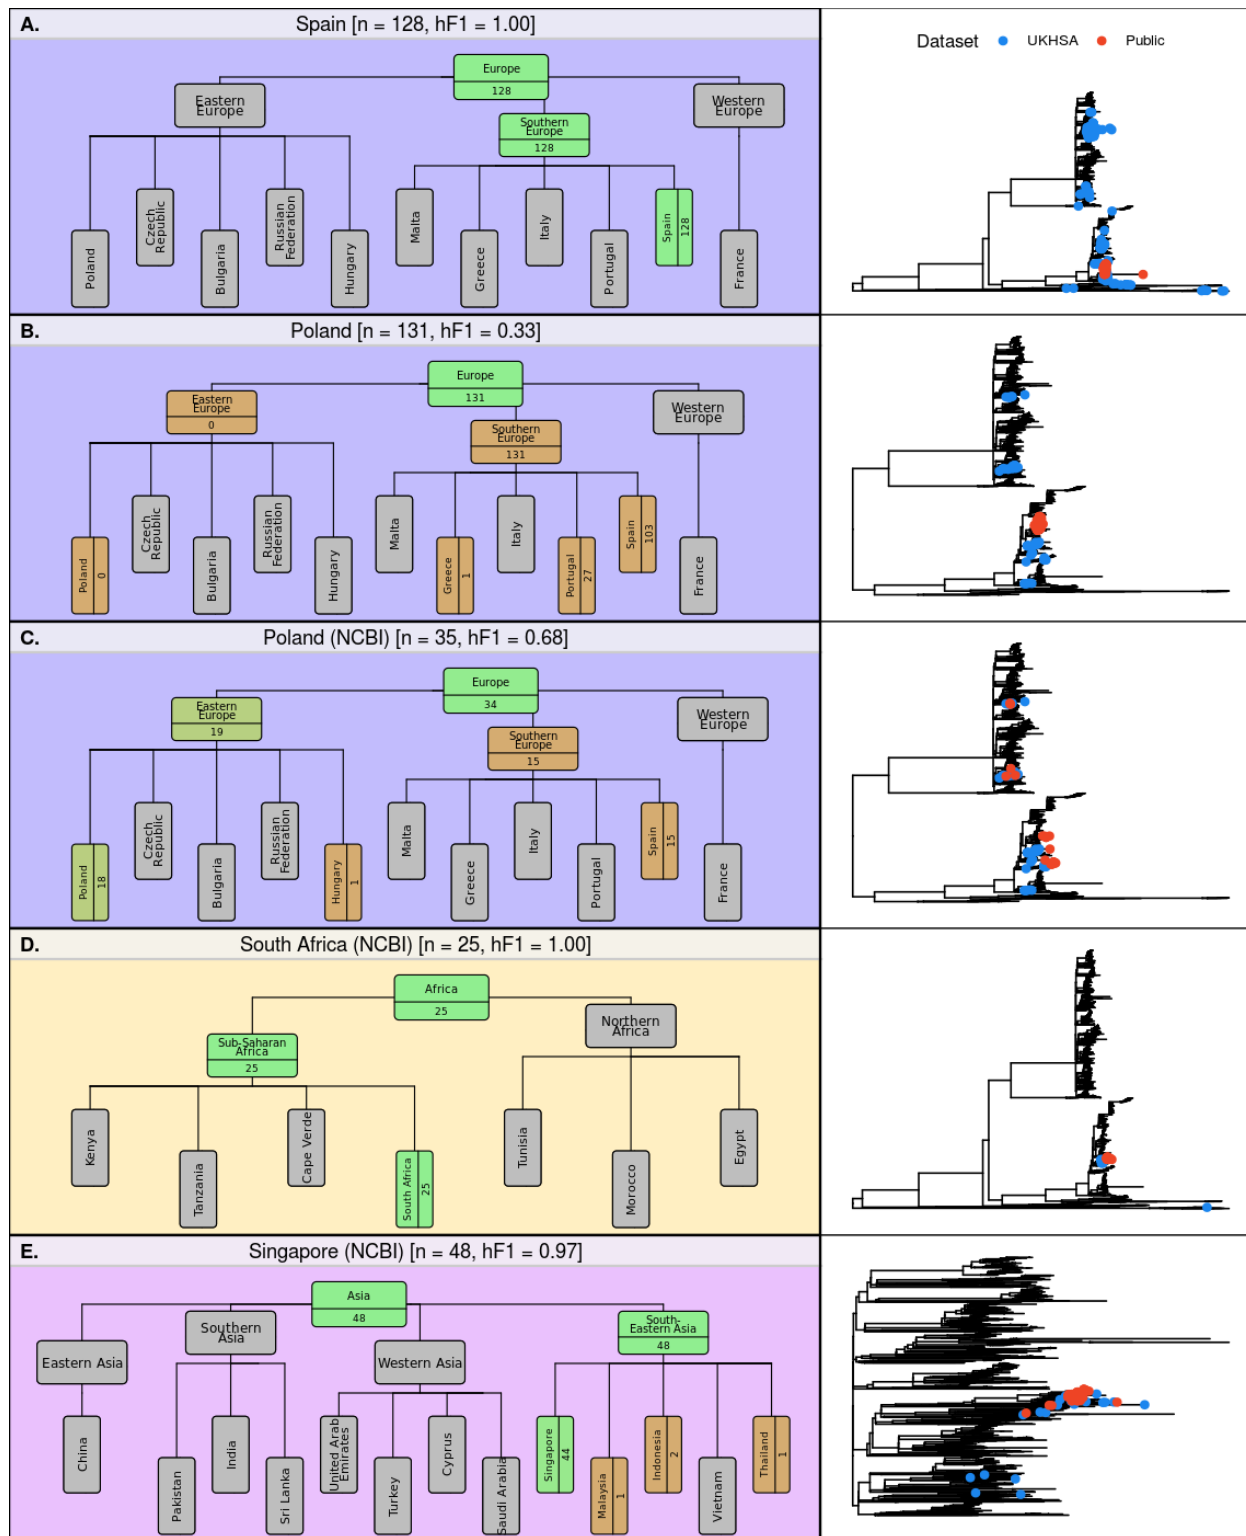

259

260 **Figure 5. Hierarchical classification summaries for five additional validation datasets. A)**  
261 128 samples from an international outbreak which originated in Spain in 2015 ([Inns et al. 2017](#))  
262 **B)** 131 samples from a large-scale international outbreak which originated from Polish eggs  
263 between 2015-2018 ([Pijnacker et al. 2019](#)). **C)** 35 samples from Poland uploaded to the NCBI  
264 database between 2014-2019. **D)** 25 samples from South Africa uploaded to the NCBI database  
265 between 2014-2019. **E)** 48 samples from Singapore uploaded to the NCBI database between  
266 2014-2019. The number of samples assigned per class are indicated for classes relevant to the  
267 query dataset. Class boxes are coloured by the proportion of correctly/incorrectly classified  
268 samples (correct: green, incorrect: red). Right-hand panel for A-E displays phylogenetic tree  
269 indicating where validation data (red) and training data (blue) cluster for that class.  
270

### 271 **The optimised hML model provides accurate predictions in 4/5 validation datasets**

272 The hML model was further validated by application to a series of external, independent  
273 datasets (Table S4). The initial datasets were from two UK-based, well-characterised and  
274 epidemiologically-traced imported food outbreaks. Sample redundancy between validation and  
275 training datasets was removed before comparison. A 2015 outbreak epidemiologically-traced to  
276 eggs imported from Spain ([Inns et al. 2017](#)) was 100% correctly attributed to a Spanish origin  
277 (**Figure 5A**). A multi-country outbreak originating from Polish egg farms ([Pijnacker et al. 2019](#)),  
278 comprising of two distinct lineages each differing by 5 or fewer SNPs, was correctly attributed to  
279 a European origin (131/131 cases), but subsequently misattributed to a Southern Europe  
280 (131/131 cases), Spanish origin (103/130) (**Figure 5B**). This complex outbreak was a  
281 particularly difficult test case for the model, as it had been continuously causing cases in 16  
282 European countries for several years (2015-2018). The outbreak cases were also  
283 phylogenetically distinct from those associated with travel to Poland in the UKHSA dataset  
284 (**Figure 5B**).

285 The model was further tested on datasets extracted from public databases. Three countries  
286 from three different regions were identified from the NCBI database as having acceptable  
287 sample numbers (>20), falling within the timeframe of the current model (2014-2019) and having  
288 been sampled from a country included in the current model hierarchy (South Africa, Singapore  
289 and Poland). The Polish dataset, sampled from poultry, was attributed to a European origin with  
290 high accuracy (34/35, 97.1%), 19 of these were subsequently attributed to an East European  
291 origin (19/35, 54.3%) or which 18 were attributed to Poland (18/35, 51.4%) (**Figure 5C**). The  
292 remaining 15 samples were misclassified as having a Spanish origin (15/35, 42.9%). The South  
293 African dataset of clinical cases, was correctly attributed to a South African origin with 100%  
294 accuracy (25/25) (**Figure 5D**). The Singaporean dataset of primarily human cases was correctly  
295 attributed to South-East Asia (48/48) with 91.7% of samples being correctly attributed to a

296 Singaporean origin (44/48) and 4 samples being attributed to Indonesia (2), Malaysia (1) and  
297 Thailand (1) (**Figure 5E**).

298 Application of the hML model to independent validation datasets indicated that that the model  
299 provides highly accurate and granular predictions for single-country outbreaks which occur over  
300 short time-frames. A large-scale, long-term, multi-country outbreak was poorly predicted by the  
301 model, most likely because many outbreak-associated isolates were mislabelled, but present in  
302 the training dataset (i.e. not labelled as Poland). However, application of the hML model to a  
303 range of other independent validation datasets provided highly accurate and granular  
304 predictions.

305

## 306 **Discussion**

307 Outbreaks caused by foodborne pathogens, where rapid response times are essential for  
308 effective interventions, represent an epidemiological challenge for public health bodies as they  
309 arise from complex interconnected global supply chains which include many potential sources of  
310 infection. Our optimised hML model generates accurate predictions of the geographical origin of  
311 *S. Enteritidis* genomes directly from raw read data in under 4 minutes per sample. The output of  
312 this pipeline is a predicted probability per hierarchical level (i.e. region, sub-region and country  
313 levels) allowing for granular source attribution alongside an assessment of confidence in the  
314 prediction. The observed classification accuracy of the model was high, varying across both  
315 hierarchical levels and individual classes (**Figures 2-3**). Accuracy was highest at the regional  
316 level (macro F1: 0.954), which contained the highest number of samples for training and the  
317 lowest level of class imbalance, before dropping at the subregional (macro F1: 0.718) and  
318 country levels (macro F1: 0.661), both of which contained generally lower and more variable  
319 numbers of samples, increasing class imbalance (**Figure 3**). It should be noted that these  
320 macro values, being an average of the F1 score across all classes, were strongly influenced by  
321 outliers representing a handful of classes with poor classification accuracy (e.g. United States,  
322 France, US, Italy). Variation in classification accuracy was negatively associated with both low  
323 sample number and increasing within-class genetic diversity (**Figure S2-3**), although this did not  
324 fully explain the variation in predictive accuracy observed in the model, suggesting other  
325 complex factors may be involved. Although variation in predictive accuracy was observed, a  
326 number of commonly visited countries were predicted with extremely high predictive accuracy  
327 (e.g. Cuba, Egypt, Indonesia, Jamaica, Malta, Spain, Thailand, Tunisia and Turkey) which  
328 would be of high utility for UK epidemiologists tracing foodborne outbreaks .

329 Selection and optimisation of the ML classifier and resampler methods, as well as pre-  
330 classification feature selection was performed in a stepwise manner to assess the impact of  
331 each step on the resulting model. Ensemble classifiers outperformed other classifiers (**Figure 2**,  
332 **Table S2**). Interestingly, considering the large variation observed in some nodes of the  
333 hierarchy, class imbalance was not found to have a large impact on the resulting model. Two of  
334 the top four best-performing classifier/resampler combinations included no resampling. These  
335 were both ensemble classifiers, suggesting that these were better able to account for the high  
336 dimensionality, high collinearity and variable levels of class imbalance than other classifier  
337 models. The resampling itself was observed to differentially impact on the various hierarchical  
338 levels (**Figure 2**). The model required a sample to be classified at a higher hierarchical level  
339 before passed to the next nested level (e.g. classified as European before being classes as  
340 West/East/South European) which biased model selection towards favouring classifiers which  
341 improved regional and subregional predictions. It should be noted that each  
342 classifier/resampler/feature selection step was applied uniformly across the hierarchy prior to  
343 parameter optimization, to allow for an assessment of individual steps on the resulting model.  
344 An attractive, although less informative, approach for future retraining would be to optimise all  
345 steps (classifier/resampler/feature selection) on a per node basis using an AutoML method,  
346 such as the genetic algorithm used in the current work to optimise hyperparameters in the final  
347 hML RF model ([Olson et al. 2016](#)). Validation using external datasets indicated that the model  
348 robustly predicted the majority of novel samples, but was less effective for complex multi-  
349 country, multi-year outbreaks (**Figure 5**).

350 We acknowledge that this study has a number of important limitations. Whilst we have  
351 presented evidence that the hML model can robustly predict geographical source for *S.*  
352 Enteritidis, the COVID-19 pandemic has resulted in a vast disruption to international travel over  
353 the past two years. The UKHSA is already seeing a return to pre-pandemic levels of imported  
354 infection and expect the pattern of seasonality of imported *S. Enteritidis* infections to return.  
355 However, there may be unquantified impacts on the global food network which could result in a  
356 reduction in the prediction accuracy of the current model and would likely require retraining on  
357 post-pandemic data. Furthermore, the dataset, collected as part of the UKHSA's national  
358 genomic surveillance program, is a product of two factors; the countries to which UK residents  
359 commonly travel and the variable likelihood of *S. Enteritidis* infection whilst in these countries  
360 (**Figure 1**). Both factors influence the geographical distribution of sampling locations present in  
361 the dataset as well as the number of available samples per country. For example, of the 122  
362 countries present in the initial dataset only 38 (31%) were present in sufficient quantities over

363 the surveillance period to include in the model. The second factor influencing the composition of  
364 the dataset is the variable risk of infection posed by the countries present in the dataset. Some  
365 commonly visited countries posed only minor risk of infection (e.g. France) whilst others posed a  
366 disproportionately high risk of infection on visiting (e.g. Turkey) (**Figure 1E**). Due to the complex  
367 nature of both the global food supply chain and pathogen transmission dynamics it is likely that  
368 these factors will cause misattribution in some cases; for instance, UK-travellers might travel to  
369 country A and consume contaminated foodstuffs imported from country B which was absent  
370 from the training data, and the model would then 'correctly' assign future cases to country A.  
371 One might also imagine that country C, which is only rarely visited by UK-travellers, produces a  
372 contaminated foodstuff and exports it to country D, which is often visited by UK-travellers,  
373 causing the model to misattribute a sample from country C to D. In these cases the model would  
374 provide useful information on the origin of infection, but would not identify the true reservoir of  
375 the pathogen. Evidence of this form of misattribution has been presented in the Polish eggs  
376 outbreak dataset used for validation (**Figure 5B**). This outbreak represents a particularly difficult  
377 attribution problem as many of the contaminated eggs were distributed to 18 different EU  
378 countries during the sampling period used to train the model – allowing for the inclusion of  
379 potentially erroneous sample labels in the training data and confounding the discriminatory  
380 signal. This outbreak represents an important limitation of the current model and illustrates how  
381 difficult multi-country outbreaks or long-established food network contamination pathways can  
382 confound accurate classification.

383 We have presented a conceptually simple hML model which is able to successfully predict the  
384 geographical source of infection for a wide range of popular destinations frequented by UK  
385 travellers. However, the basis of this work was a single dataset which, although exceptional in  
386 breadth of sampling and metadata, compositionally reflects locations routinely visited by UK  
387 travellers. A number of destinations were present in the dataset for which there is little to no data  
388 present in public databases during a matching time period (e.g. Malta). This demonstrates the  
389 additional utility provided by the collection of recent travel information as part of a national  
390 surveillance programme to generate consistent geographical coverage for disease-sampling  
391 over a much larger geographical area. One could imagine that coordination between public  
392 health bodies with complementary citizen travel preferences would allow for a small network of  
393 national genomic surveillance initiatives to provide global coverage of gastrointestinal diseases  
394 without the costly necessity of instituting a comprehensive global surveillance initiatives. If this  
395 was coupled with a similar hML model to the one detailed here, then rapid and precise global  
396 predictions of the source of gastrointestinal disease outbreaks could be achieved.



397 This study provides a framework for future hML applications in the area of pathogen genomics.  
398 Other geographically stratified problems which might benefit from a hierarchical approach  
399 include antimicrobial resistance in *Escherichia coli* ([Ingle et al. 2018](#)), transmission of  
400 *Staphylococcus aureus* in hospital networks ([Donker et al. 2017](#)) and application to other  
401 serovars of *Salmonella enterica* ([Lupolova et al. 2017](#)). The model presented herein is  
402 conceptually simple and does not incorporate temporal information, allow for multiple labels to  
403 be assigned to samples or incorporate animal host/food source information, which may improve  
404 prediction of multi-country outbreaks or provide additional information to further enhance  
405 epidemiological follow-up ([Lupolova et al. 2017](#); [Zhang et al. 2019](#); [Lupolova, Lycett, and Gally](#)  
406 [2019](#)). This work represents the first application of hML for the automation of genomics-based  
407 geographical source attribution. The rapidity of predictions from raw sequencing data should  
408 greatly enhance epidemiologists' ability to trace the source of gastrointestinal outbreaks by  
409 condensing complex genetic data into understandable and actionable outputs.

410

## 411 **Methods**

412

### 413 **Genome Collection and Processing**

414 The initial dataset consisted of 10,223 *S. Enteritidis* isolates collected and sequenced by  
415 UKHSA between 2014-2019 as a part of their routine disease monitoring programme. Raw read  
416 data was downloaded from the Short Read Archive (Bioproject: PRJNA248792) (**Table S3**).  
417 Reads were filtered using Trimmomatic 0.39, residual Illumina adapter sequences were  
418 removed, the first and last 3 base pairs in a read were trimmed, before a sliding window quality  
419 trimming of 4 bases with a quality threshold of 20 was applied and reads of less than 36 bp  
420 (after trimming) were removed (ILLUMINACLIP:PE\_All.fasta:2:30:10:2:keepBothReads  
421 SLIDINGWINDOW:4:20 LEADING:3 TRAILING:3 MINLEN:36) ([Bolger, Lohse, and Usadel](#)  
422 [2014](#)). The coverage of the resulting file was estimated against the size of *S. Enteritidis*  
423 reference genome P12510 ([Thomson et al. 2008](#)) and downsampled to ~100x coverage using  
424 in-house scripts. Musket 1.1 was applied for k-mer spectrum read correction using a k-mer size  
425 of 31 bp. Unitigs were generated directly from filtered reads using bcalm 2.2.3 with a k-mer size  
426 of 31 bp and a minimum k-mer abundance of 6 (estimated from data) ([Chikhi, Limasset, and](#)  
427 [Medvedev 2016](#)).

428 Reads were mapped to *S. Enteritidis* reference genome P12510 and variants were called using  
429 SNIPPY 4.6 with a minimum coverage of 10x and a mapping quality of 60 ([Seemann n.d.](#)). A

430 reduced alignment of variant sites was generated using `snp-sites` (Page et al. 2016) and passed  
431 to IQ-Tree for phylogenetic reconstruction using a GTR+I+G substitution model and ultra-fast  
432 bootstrapping (1000 bootstraps) (Nguyen et al. 2015). An interactive maximum likelihood  
433 phylogenetic tree is available in Microreact at  
434 <https://microreact.org/project/kQEhcTy4ohcqN9bjcPUWLw-ukhsasenteritidishml>.

### 435 **Isolate Selection for Machine Learning**

436 Of the initial 10,223 isolates, 3,434 had matched recent reported travel data, in the form of  
437 'country' of recent travel (within 28 days of generating symptoms), provided by the clinical  
438 laboratories on submission of the isolate. These isolates were selected as potential candidates  
439 for ML model construction and testing. The 3434 initial isolates were subsequently filtered to  
440 identify samples that had both consistent metadata and good sequence quality. The criteria for  
441 inclusion included: a) clear and uncontradictory recent travel metadata, unrecognised or  
442 nonexistent locations (e.g. Yugoslavia) were removed; b) reads that were not genetically distant  
443 from the majority of isolates in the collection as measured by MASH distance; c) reads that had  
444 >28x coverage of *S. Enteritidis* reference genome P12510; d) samples that did not have a total  
445 unitig length greater than 5,250,000 bp; e) k-mers created from the reads that did not have a  
446 singleton frequency of >0.5. A total of 220 samples were excluded due to these criteria.

447 Further dataset reduction was performed to remove genetically identical, or near-identical,  
448 isolates from the collection prior to processing for ML. SNP Address was used as a proxy for  
449 genetic relatedness and a single example of each SNP Address (SNP5) was randomly selected  
450 per country for further analysis. Samples were assigned to region and subregion based upon  
451 the UN M49 Standard for regional codes  
452 (<https://unstats.un.org/unsd/methodology/m49/overview>) [Accessed: 30 Nov 2021]. Recent  
453 travel information which represented historically distinct subregions or autonomous subregions  
454 of a larger country grouping (e.g. Hong Kong), were considered a part of the larger entity for the  
455 purpose of classification. Any country with less than ten representative samples after filtering  
456 were excluded from further analysis. The final sample collection after filtering contained 2313  
457 samples (**Table S3**).

458 The relative risk of acquiring *S. Enteritidis* infection when travelling was estimated using the  
459 ratio of the proportion of UKHSA clinical isolates reported as having recently travelled to each  
460 country over the proportion of all UK travellers travelling to that country as recorded by the  
461 Office of National Statistics (Office of National Statistics 2020). The data used for this  
462 comparison was date (year) and location (country) matched before proportions were calculated.

463 The NCBI Pathogen Genome database was interrogated to identify *S. Enteritidis* isolates  
464 collected in countries present in the hML model over a matching time period [Accessed: 18 Nov  
465 2021]. 2019 was excluded as UKHSA samples were only available for a relatively short duration  
466 of the year (Jan-April). Variation in isolate number collected each year was controlled for by  
467 resampling with replacement (1000 samples). The resulting yearly sampling data was compared  
468 to a uniform distribution using the Kolmogorov-Smirnov D statistic to quantify deviation from a  
469 consistent sampling scheme for both the UKHSA and NBCI reference dataset.

#### 470 **Unitig Processing for ML**

471 A coloured De Bruijn graph was constructed for the complete genome collection by passing the  
472 unitigs for individual samples to unitig caller v1.2.0 (<https://github.com/johnlees/unitig-caller>).  
473 This identified 426,647 unique unitigs present in the 2313 genome collection. The resulting De  
474 Bruijn graph was then queried to establish the presence/absence of each unitig on a per sample  
475 basis. Unitigs present/absent in only a single sample were removed. Unitigs which co-occurred  
476 in the same subset of samples (i.e. perfect correlation) were clustered into a single feature  
477 'pattern' for input into feature selection and ML model building algorithms. This reduced the input  
478 from 426,647 unitig features into 94,865 pattern features. The dataset was split into 75%-25%  
479 train-test ratio stratified by country for downstream applications.

#### 480 **Hierarchical Classifier Design**

481 A class-prediction top-down hierarchical classifier framework was developed to be compatible  
482 with any scikit-learn classifier which generates a per-sample predicted probability value. The  
483 framework followed a Local Classifier per Node (LCN) approach as detailed in Silla and Freitas  
484 2011 ([Silla and Freitas 2011](#)), wherein a multi-class classifier was fitted at each node of the  
485 hierarchy to differentiate between the various child classes of that node. The geographical  
486 hierarchy used as the basis of the classifier was constructed using the three levels of  
487 geographical labels, region->subregion->country, assigned by UN M49 Standard for regional  
488 codes. At each node samples were relabelled according to the current hierarchical level (e.g.  
489 Cuba and the United States would be labelled as Americas at the root/regional node) before  
490 being passed to the classifier. Only samples in classes relevant to the current hierarchical node  
491 classifier were included in the training data for each classifier (i.e. samples from countries which  
492 were not a part of the region/subregion being trained were excluded).

## 493 Hierarchical Classification Strategy

494 The hierarchical classifier framework allowed for flexible assignment of samples to a single  
495 unambiguous class in the hierarchy (i.e. a single region/sub-region/country or unclassified).  
496 Samples were first classified at the root (regional) node. A classification was assigned if the  
497 predicted probabilities adhered to the threshold criteria, that the maximum probability value at  
498 that node exceeds a threshold value (0.5). Only then would the sample be passed to the next  
499 node in the hierarchy. This is not permissive of multiple, conflicting classifications.

500 A range of hierarchical and non-hierarchical statistics were applied to aid model assessment.  
501 Standard non-hierarchical statistics were generated for each individual classifier/node  
502 (precision, recall, micro/macro/weighted F1) as well as their hierarchical analogues (hP, hR,  
503 hF1). These were calculated as described by Kiritchenko et al 2005 ([Kiritchenko, Matwin, and  
504 Famili 2005](#)):

$$505 \quad hP = \frac{|\hat{T}_i|}{|\hat{P}_i|} \quad hR = \frac{|\hat{T}_i|}{|\hat{P}_i|} \quad hF1 = \frac{2 * hP * hR}{hP + hR}$$

506 where  $\hat{P}_i$  is the set of predicted classes consisting of the most specific class (i.e. the lowest  
507 level of the hierarchy) predicted for test example  $i$  plus all parent classes and  $\hat{T}_i$  is the set of  
508 classes consisting of the most specific true class of test example  $i$  and all its ancestor classes.  
509 Summations were calculated over all test samples. Macro hF1 was calculated by taking the  
510 average F1 of all classes of interest.

## 511 Feature Selection, Resampling, Model Testing and Optimisation

512 During model selection various combinations of classifier, resampler and feature selection  
513 models were applied to the test-train dataset to assess their suitability for model building. These  
514 were assessed based on a combination of non-hierarchical statistics including overall  
515 micro/macro F1 and micro/macro F1 per hierarchical level. The implemented classifier models  
516 included K-Nearest Neighbours, Support Vector, Random Forest, Gaussian Naive Bayes,  
517 XGBoost, Extra Trees. All classifier models were implemented using scikit-learn using a set  
518 seed value and default parameters with the exception of Random Forest, Extra Trees and  
519 XGBoost classifiers which were run with `n_estimators = 1000` and SVC which was run with  
520 `probability = True`.

521 The implemented resampling schemes included downsampling (smallest class), upsampling  
522 (largest class), resampling to the mean count of all classes and hierarchically aware  
523 implementation for the previously described samplers. Hierarchically aware resampling was  
524 developed using in-house scripts to iteratively apply a resampler to each of the lowest levels of  
525 the hierarchy (country) before passing the resampled data to higher levels in the hierarchy for  
526 further resampling.

527 An all-vs-all comparison of classifier vs resampler models was used to identify the most suitable  
528 combinations for further optimisation (**Table S2**). In all cases a fixed seed value was used for  
529 comparison of models and resamplers. The top 4 combinations of classifier-resampler were  
530 selected for feature selection comparison. The implemented feature selection method was  
531 Random Forest using varying numbers of patterns as training data (**Figure 2D**).

532 The final classifier-resampler-selection combination was passed to a genetic algorithm  
533 framework (TPOT) to identify an approximation of optimal parameters from a wide range of  
534 possible combinations (sklearn.ensemble.RandomForestClassifier: 'n\_estimators': [100, 500,  
535 1000], 'criterion': ['gini', 'entropy'], 'max\_features': np.array([0.05, 0.1 , 0.15, 0.2 , 0.25, 0.3 ,  
536 0.35, 0.4 , 0.45, 0.5 , 0.55, 0.6 , 0.65, 0.7 , 0.75, 0.8 , 0.85, 0.9 , 0.95, 1. ]), 'min\_samples\_split':  
537 range(2, 21), 'min\_samples\_leaf': range(1, 21), 'bootstrap': [True, False]) ([Olson et al. 2016](#)).  
538 The TPOT genetic algorithm used the macro F1 score per node as the optimisation metric, was  
539 run for 100 generations with a population size of 50 and stratified 3-fold cross validation of the  
540 input database and was stopped if no model improvement was found for 10 generations. A 'flat'  
541 model was also trained and tested in the same manner for comparison, whereby a multiclass  
542 Random Forest classifier was provided with a randomly oversampled dataset which only  
543 included 'country' class labels (i.e. region/subregion were ignored) (**Table S1**).

#### 544 **Validation Dataset Collection and Processing**

545 Various public datasets were used as additional validation data including outbreaks described in  
546 previous publications ([Inns et al. 2017](#); [Pijnacker et al. 2019](#)) and samples from the 38 countries  
547 included in this study identified from the NCBI Pathogen Genome database [Accessed: 18 Nov  
548 2021]. In the case of samples taken from previous publications, accession numbers were  
549 identified from these manuscripts, samples downloaded and passed through the genome and  
550 unitig processing pipelines described above. Additionally, NCBI Pathogen Genome database  
551 metadata was downloaded [Accessed: 18 Nov 2021] and filtered to return only samples which  
552 had publicly accessible read files, country metadata from the 38 countries and were collected  
553 between 2014-2018. Three representative countries were chosen to trial the model on (Poland,

554 South Africa and Singapore). Read data was downloaded and passed through the unitig  
555 processing pipeline as described above. The presence of unitigs generated from the UKHSA  
556 collection which formed the basis to the hML model was ascertained using unitig-counter  
557 (<https://github.com/johnlees/unitig-counter>) (Jaillard et al. 2018). The unitig features were then  
558 converted into the patterns generated from the UKHSA collection as described above.

559

## 560 **Data Availability**

561 The final optimised hierarchical model as well as a pipeline for pre-processing raw read data to  
562 unitigs/patterns for input is available from <https://github.com/SionBayliss/HierarchicalML> with a  
563 short description and tutorial for ease of use. This end-to-end process, from FASTQ to  
564 prediction, is open access and available to users. Short read sequencing data is available from  
565 the Short Read Archive (Bioproject: PRJNA248792).

566

## 567 **Acknowledgements**

568 We would like to acknowledge both Dr Harry Thorpe and Dr Nicola Coyle who have both  
569 previously contributed to the development of scripts which underlie the unitig processing  
570 pipeline. This work was funded by an Academy of Medical Sciences Springboard grant  
571 (SBF005\1089). CJ, TD and MAC are affiliated to the National Institute for Health Research  
572 Health Protection Research Unit (NIHR HPRU) in Gastrointestinal Infections and Genomics and  
573 Enabling Data at University of Liverpool and University of Warwick respectively in partnership  
574 with the UK Health Security Agency (UKHSA). CJ and MAC are based at UKHSA. The views  
575 expressed are those of the author(s) and not necessarily those of the NIHR, the Department of  
576 Health and Social Care or the UK Health Security Agency.

577

## 578 **References**

- 579 Allard, M. W., Bell, R., Ferreira, C. M., Gonzalez-Escalona, N., Hoffmann, M., Muruvanda, T.,  
580 Ottesen, A., Ramachandran, P., Reed, E., Sharma, S., Stevens, E., Timme, R., Zheng, J., &  
581 Brown, E. W. (2018). Genomics of foodborne pathogens for microbial food safety. *Current*  
582 *Opinion in Biotechnology*, 49, 224–229.
- 583 Argimón, S., Abudahab, K., Goater, R. J. E., Fedosejev, A., Bhai, J., Glasner, C., Feil, E. J.,  
584 Holden, M. T. G., Yeats, C. A., Grundmann, H., Spratt, B. G., & Aanensen, D. M. (2016).  
585 Microreact: visualizing and sharing data for genomic epidemiology and phylogeography.  
586 *Microbial Genomics*, 2(11), e000093.
- 587 Ashton, P. M., Nair, S., Peters, T. M., Bale, J. A., Powell, D. G., Painset, A., Tewolde, R.,  
588 Schaefer, U., Jenkins, C., Dallman, T. J., de Pinna, E. M., Grant, K. A., & Salmonella Whole

- 589 Genome Sequencing Implementation Group. (2016). Identification of *Salmonella* for public  
590 health surveillance using whole genome sequencing. *PeerJ*, 4, e1752.
- 591 Bolger, A. M., Lohse, M., & Usadel, B. (2014). Trimmomatic: a flexible trimmer for Illumina  
592 sequence data. *Bioinformatics*, 30(15), 2114–2120.
- 593 Brown, E., Dessai, U., McGarry, S., & Gerner-Smidt, P. (2019). Use of Whole-Genome  
594 Sequencing for Food Safety and Public Health in the United States. *Foodborne Pathogens and*  
595 *Disease*, 16(7), 441–450.
- 596 Chattaway, M. A., Dallman, T. J., Larkin, L., Nair, S., McCormick, J., Mikhail, A., Hartman, H.,  
597 Godbole, G., Powell, D., Day, M., Smith, R., & Grant, K. (2019). The Transformation of  
598 Reference Microbiology Methods and Surveillance for *Salmonella* With the Use of Whole  
599 Genome Sequencing in England and Wales. *Frontiers in Public Health*, 7, 317.
- 600 Chikhi, R., Limasset, A., & Medvedev, P. (2016). Compacting de Bruijn graphs from sequencing  
601 data quickly and in low memory. *Bioinformatics*, 32(12), 201–208.
- 602 Cowley, L. A., Dallman, T. J., Fitzgerald, S., Irvine, N., Rooney, P. J., McAteer, S. P., Day, M.,  
603 Perry, N. T., Bono, J. L., Jenkins, C., & Gally, D. L. (2016). Short-term evolution of Shiga toxin-  
604 producing *Escherichia coli* O157:H7 between two food-borne outbreaks. *Microbial Genomics*,  
605 2(9), e000084.
- 606 Dallman, T., Inns, T., Jombart, T., Ashton, P., Loman, N., Chatt, C., Messelhaeuser, U., Rabsch,  
607 W., Simon, S., Nikisins, S., Bernard, H., le Hello, S., Jourdan da-Silva, N., Kornschöber, C.,  
608 Mossong, J., Hawkey, P., de Pinna, E., Grant, K., & Cleary, P. (2016). Phylogenetic structure of  
609 European *Salmonella* Enteritidis outbreak correlates with national and international egg  
610 distribution network. *Microbial Genomics*, 2(8), e000070.
- 611 Daniel, N., Casadevall, N., Sun, P., Sugden, D., & Aldin, V. (2020). *The Burden of Foodborne*  
612 *Disease in the UK 2018*. Food Standards Agency.
- 613 Donker, T., Reuter, S., Scriberras, J., Reynolds, R., Brown, N. M., Török, M. E., James, R.,  
614 Network, E. O. E. M. R., Aanensen, D. M., Bentley, S. D., Holden, M. T. G., Parkhill, J., Spratt,  
615 B. G., Peacock, S. J., Feil, E. J., & Grundmann, H. (2017). Population genetic structuring of  
616 methicillin-resistant *Staphylococcus aureus* clone EMRSA-15 within UK reflects patient referral  
617 patterns. *Microbial Genomics*, 3(7), e000113.
- 618 Ebel, E. D., Williams, M. S., Cole, D., Travis, C. C., Klontz, K. C., Golden, N. J., & Hoekstra, R.  
619 M. (2016). Comparing Characteristics of Sporadic and Outbreak-Associated Foodborne  
620 Illnesses, United States, 2004-2011. *Emerging Infectious Diseases*, 22(7), 1193–1200.
- 621 Feil, E. J., & Spratt, B. G. (2001). Recombination and the Population Structures of Bacterial  
622 Pathogens. *Annual Reviews in Microbiology*, 55, 561-90.
- 623 Gould, L. H., Kline, J., Monahan, C., & Vierk, K. (2017). Outbreaks of Disease Associated with  
624 Food Imported into the United States, 1996-2014. *Emerging Infectious Diseases*, 23(3), 525–  
625 528.
- 626 Ingle, D. J., Levine, M. M., Kotloff, K. L., Holt, K. E., & Robins-Browne, R. M. (2018). Dynamics  
627 of antimicrobial resistance in intestinal *Escherichia coli* from children in community settings in  
628 South Asia and sub-Saharan Africa. *Nature Microbiology*, 3(9), 1063–1073.
- 629 Inns, T., Ashton, P. M., Herrera-Leon, S., Lighthill, J., Foulkes, S., Jombart, T., Rehman, Y., Fox,  
630 A., Dallman, T., DE Pinna, E., Browning, L., Coia, J. E., Edeghere, O., & Vivancos, R. (2017).  
631 Prospective use of whole genome sequencing (WGS) detected a multi-country outbreak of  
632 *Salmonella* Enteritidis. *Epidemiology and Infection*, 145(2), 289–298.

- 633 Jaillard, M., Lima, L., Tournoud, M., Mahé, P., van Belkum, A., Lacroix, V., & Jacob, L. (2018). A  
634 fast and agnostic method for bacterial genome-wide association studies: Bridging the gap  
635 between k-mers and genetic events. *PLoS Genetics*, 14(11), e1007758.
- 636 Kiritchenko, S., Matwin, S., & Famili, F. (2005, January 1). Functional Annotation of Genes  
637 Using Hierarchical Text Categorization. *BioLINK SIG: Linking Literature, Information and*  
638 *Knowledge for Biology, a Joint Meeting of The ISMB BioLINK Special Interest Group on Text*  
639 *Data Mining and The ACL Workshop on Linking Biological Literature, Ontologies and*  
640 *Databases: Mining Biological Semantics*.
- 641 Li, S., He, Y., Mann, D. A., & Deng, X. (2021). Global spread of *Salmonella* Enteritidis via  
642 centralized sourcing and international trade of poultry breeding stocks. *Nature Communications*,  
643 12(1), 5109.
- 644 Lupolova, N., Dallman, T. J., Holden, N. J., & Gally, D. L. (2017). Patchy promiscuity: machine  
645 learning applied to predict the host specificity of *Salmonella enterica* and *Escherichia coli*.  
646 *Microbial Genomics*, 3(10), e000135.
- 647 Lupolova, N., Lycett, S. J., & Gally, D. L. (2019). A guide to machine learning for bacterial host  
648 attribution using genome sequence data. *Microbial Genomics*, 5(12).
- 649 McLauchlin, J., Aird, H., Andrews, N., Chattaway, M., de Pinna, E., Elviss, N., Jørgensen, F.,  
650 Larkin, L., & Willis, C. (2019). Public health risks associated with *Salmonella* contamination of  
651 imported edible betel leaves: Analysis of results from England, 2011-2017. *International Journal*  
652 *of Food Microbiology*, 298, 1–10.
- 653 Nguyen, L.-T., Schmidt, H. A., von Haeseler, A., & Minh, B. Q. (2015). IQ-TREE: a fast and  
654 effective stochastic algorithm for estimating maximum-likelihood phylogenies. *Molecular Biology*  
655 *and Evolution*, 32(1), 268–274.
- 656 Office of National Statistics. (2020). *Travel trends estimates: UK residents' visits abroad: 2009-*  
657 *2019*.  
658 <https://www.ons.gov.uk/peoplepopulationandcommunity/leisureandtourism/datasets/ukresidents>  
659 [visitsabroad](https://www.ons.gov.uk/peoplepopulationandcommunity/leisureandtourism/datasets/ukresidents)
- 660 Olson, R. S., Bartley, N., Urbanowicz, R. J., & Moore, J. H. (2016). Evaluation of a Tree-based  
661 Pipeline Optimization Tool for Automating Data Science. *Proceedings of the Genetic and*  
662 *Evolutionary Computation Conference 2016*, 485–492.
- 663 Page, A. J., Taylor, B., Delaney, A. J., Soares, J., Seemann, T., Keane, J. A., & Harris, S. R.  
664 (2016). SNP-sites: rapid efficient extraction of SNPs from multi-FASTA alignments. *Microbial*  
665 *Genomics*, 2(4), e000056.
- 666 PHE. (2017). *Travel-associated non typhoidal Salmonella infection in England, Wales and*  
667 *Northern Ireland: 2014*. PHE.
- 668 Pijnacker, R., Dallman, T. J., Tijmsma, A. S. L., Hawkins, G., Larkin, L., Kotila, S. M., Amore, G.,  
669 Amato, E., Suzuki, P. M., Denayer, S., Klamer, S., Pászti, J., McCormick, J., Hartman, H.,  
670 Hughes, G. J., Brandal, L. C. T., Brown, D., Mossong, J., Jernberg, C., ... International Outbreak  
671 Investigation Team. (2019). An international outbreak of *Salmonella enterica* serotype Enteritidis  
672 linked to eggs from Poland: a microbiological and epidemiological study. *The Lancet Infectious*  
673 *Diseases*, 19(7), 778–786.
- 674 Pires, S. M., Evers, E. G., van Pelt, W., Ayers, T., Scallan, E., Angulo, F. J., Havelaar, A., Hald,  
675 T., & Med-Vet-Net Workpackage 28 Working Group. (2009). Attributing the human disease  
676 burden of foodborne infections to specific sources. *Foodborne Pathogens and Disease*, 6(4),  
677 417–424.



- 678 Seemann, T. (n.d.). *snippy*. Github. Retrieved November 15, 2018, from  
679 <https://github.com/tseemann/snippy>
- 680 Silla, C. N., & Freitas, A. A. (2011). A survey of hierarchical classification across different  
681 application domains. *Data Mining and Knowledge Discovery*, 22(1), 31–72.
- 682 Somorin, Y. M., Odeyemi, O. A., & Ateba, C. N. (2021). Salmonella is the most common  
683 foodborne pathogen in African food exports to the European Union: Analysis of the Rapid Alert  
684 System for Food and Feed (1999–2019). *Food Control*, 123, 107849.
- 685 Statistics Division of the United Nations Secretariat. (2020). *Standard country or area codes for*  
686 *statistical use (M49)*. United Nations. <https://unstats.un.org/unsd/methodology/m49/>
- 687 Surveillance, Zoonoses, Epidemiology and Risk Food and Farming Group. (2007). *UK National*  
688 *Control Programme for Salmonella in Layers (gallus gallus)*. DEFRA.
- 689 Tam, C. C., Rodrigues, L. C., Viviani, L., Dodds, J. P., Evans, M. R., Hunter, P. R., Gray, J. J.,  
690 Letley, L. H., Rait, G., Tompkins, D. S., O'Brien, S. J., & IID2 Study Executive Committee.  
691 (2012). Longitudinal study of infectious intestinal disease in the UK (IID2 study): incidence in the  
692 community and presenting to general practice. *Gut*, 61(1), 69–77.
- 693 Thomson, N. R., Clayton, D. J., Windhorst, D., Vernikos, G., Davidson, S., Churcher, C., Quail,  
694 M. A., Stevens, M., Jones, M. A., Watson, M., Barron, A., Layton, A., Pickard, D., Kingsley, R. A.,  
695 Bignell, A., Clark, L., Harris, B., Ormond, D., Abdellah, Z., ... Parkhill, J. (2008). Comparative  
696 genome analysis of *Salmonella* Enteritidis PT4 and *Salmonella* Gallinarum 287/91 provides  
697 insights into evolutionary and host adaptation pathways. *Genome Research*, 18(10), 1624–  
698 1637.
- 699 UKHSA. (2021). *Non-typhoidal Salmonella data 2010 to 2019*.  
700 [https://assets.publishing.service.gov.uk/government/uploads/system/uploads/attachment\\_data/fi](https://assets.publishing.service.gov.uk/government/uploads/system/uploads/attachment_data/file/1026208/salmonella-annual-report-2019.pdf)  
701 [le/1026208/salmonella-annual-report-2019.pdf](https://assets.publishing.service.gov.uk/government/uploads/system/uploads/attachment_data/file/1026208/salmonella-annual-report-2019.pdf)
- 702 WHO. (2022). *Factsheet: Non-typhoidal Salmonella*. [https://www.who.int/news-room/fact-](https://www.who.int/news-room/factsheets/detail/salmonella-(non-typhoidal))  
703 [sheets/detail/salmonella-\(non-typhoidal\)](https://www.who.int/news-room/factsheets/detail/salmonella-(non-typhoidal))
- 704 Zhang, S., Li, S., Gu, W., den Bakker, H., Boxrud, D., Taylor, A., Roe, C., Driebe, E.,  
705 Engelthaler, D. M., Allard, M., Brown, E., McDermott, P., Zhao, S., Bruce, B. B., Trees, E.,  
706 Fields, P. I., & Deng, X. (2019). Zoonotic source attribution of *Salmonella* enterica serotype  
707 Typhimurium using genomic surveillance data, United States. *Emerging Infectious Diseases*,  
708 25(1), 82–91.
